1 Title: What's left in the tank? Identification of non-ascribed aquarium's coral collections with DNA barcodes  
2 as part of an integrated diagnostic approach

3

4 Authors: Luigi Colin<sup>1</sup>; Daniel Abed-Navandi<sup>2</sup>; Dalia A. Conde<sup>3,4</sup>; Jamie Craggs<sup>5</sup>; Rita da Silva<sup>3</sup>;  
5 Max Janse<sup>6</sup>; Björn Källström<sup>7</sup>; Alexander Pearce-Kelly<sup>8</sup>; Chris yesson<sup>1</sup>

6

7 **Institutions:**

8 1) Institute of Zoology, Zoological Society of London, Regent's Park, London NW1 4RY, UK

9 2) Haus des Meeres - Aqua Terra Zoo, Fritz Gruenbaum Platz 1, 1060 Vienna, Austria

10 3) Interdisciplinary Centre on Population Dynamics (CPop), University of Southern Denmark,  
11 Biology Department, Syddansk Universitet, Campusvej 55, DD-5230 Odense M, Denmark

12 4) Conservation Science Alliance, Species360, 7900 International Drive, Suite 1040 Bloomington,  
13 MN, 55425 USA

14 5) Horniman Museum & Gardens, 100 London Road, Forest Hill, London SE23 3PQ, UK

15 6) Royal Burgers' Zoo, Antoon van Hooffplein 1, 6816 SH Arnhem, the Netherlands

16 7) Maritime Museum & Aquarium, Karl Johansgatan 1-3, SE-41459, Göteborg, Sweden

17 8) Zoological Society of London, Regent's Park, London NW1 4RY, UK

18

19 **Communicating author:** luigi.colin@ioz.ac.uk

20

21 **Keywords:** Coral, DNA Barcoding, Aquarium, Identification, Blast match, Species

22

## 23 Abstract

24 The unprecedented threats to coral reef ecosystems from global climate change (GCC) require an  
25 urgent response from the aquarium community, which is becoming an increasingly vital coral  
26 conservation resource. Unfortunately, many hermatypic corals in aquaria are not identified to  
27 species level, which hinders assessment of their conservation significance. Traditional methods of  
28 species identification using morphology can be challenging, especially to non-taxonomists. DNA  
29 barcoding is an option for species identification of Scleractinian corals, especially when used in  
30 concert with morphology based assessment. This study uses DNA barcodes to try to identify  
31 aquarium specimens of the diverse reef-forming family *Acroporidae* from 127 samples. We  
32 identified to species name 44% of the analysed samples and provided provisional identification for  
33 80% of them (101/127, in the form of a list of species names with associate confidence values). We  
34 highlighted a sampling bias in public nucleotide sequences repertories (e.g.: GenBank) towards  
35 more charismatic and more studied species, even inside a well-studied genus like *Acropora*. In  
36 addition, we showed a potential “single observer” effect with over a quarter of the reference  
37 sequences used for these identifications coming from the same study. We propose the use of  
38 barcoding and query matching as an additional tool for taxonomic experts and general aquarists to  
39 increase their chances of making high confidence species-level identifications. We produce a  
40 standardised and repeatable methodology to increase the capacity of aquariums and other facilities  
41 to assess non-ascribed species.

42

## 43 Introduction

44 It is widely acknowledged that coral reef ecosystems are facing unprecedented threats from global  
45 climate change (GCC) e.g.(Pratchett et al. 2013; Hoegh-Guldberg et al. 2017; Cowburn et al. 2018;  
46 Hughes et al. 2018; Masson-Delmotte et al. 2018; Brondizio et al. 2019; Sheppard et al. 2020).  
47 Warm water reef-building corals create the most biodiverse ecosystems on the planet and have been

48 estimated to support 830'000 species of multi-cellular plants and animals worldwide (Bellwood and  
49 Hughes 2001; Mora et al. 2008, 2011; Fisher et al. 2015), providing a variety of habitats for fish,  
50 invertebrates and other taxa in shallow tropical seas (Bellwood and Hughes 2001). Corals in the  
51 family *Acroporidae* play a key functional ecosystem role as they are the major reef builders in the  
52 majority of warm water reefs ecosystems (Fukami et al. 2000).

53

#### 54 [Corals in aquaria](#)

55 Given the severity of the species and ecosystem level climate change threats to corals (Masson-  
56 Delmotte et al. 2018), and their reliant biodiversity, *ex situ* conservation assistance is likely to play  
57 an important part in ensuring the survival of many, perhaps the majority, of coral species. Aquaria  
58 institutions therefore have a vitally important conservation remit to support coral restoration  
59 strategies allowing for both sexual and asexual coral recruitment, biobanking and a wide range of  
60 research, education and thus contribution towards *in situ* conservation activities. Early attempts in  
61 the 1980s at keeping corals in aquaria faced difficulties (Borneman 2008; Brunner 2012) it was  
62 until 1980 that *Acropora* was the the first genus to be successfully cultured by Stüber (Borneman  
63 2008). From the 1990s onwards coral husbandry boomed, reaching a level where virtually all  
64 families of zooxanthellate corals were not only being maintained for many years, but were being  
65 propagated and traded between private and public aquaria (Borneman 2008). Specimens conserved  
66 in Aquaria thus, became a highly valuable resource for restoration strategies (Rinkevich 1995).

67

#### 68 [Identification of corals](#)

69 Coral taxonomy is a traditionally difficult discipline, subject to same challenges of modern  
70 taxonomy (Godfray 2002). The genus *Acropora* is among the most diverse and geographically  
71 widespread reef building corals (Wallace 1999). Research on *Acropora* suggests that species limits

72 may be sometimes narrower, sometimes broader, than generally perceived (Wallace and Willis  
73 1994). Currently the number of officially recognised *Acropora* species are between 135 (WORMS  
74 (Horton et al. 2020)) and 163 (Corals of the World (Veron et al. 2020)), reaching 186 if we include  
75 the “*taxon inquirendum*” on WORMS (Horton et al. 2020). There have been different attempts at  
76 grouping these species within the genus *Acropora* (Wallace 1999). These attempts lead to the  
77 creation of the concept of species group (aka syngameon). The concept of species groups, first  
78 defined for convenience of identification and without implying taxonomic relation, has been revised  
79 to reflect the evolution and phylogeny of the genus (Wallace 1999; Wallace et al. 2012). The use of  
80 genetic tools for species identification has provided another line of evidence for species  
81 delimitation, further adding to the blurred boundaries between species groups, species and sub-  
82 species.

83

84 Traditionally, identification of coral has relied on morphological skeletal features, with the great  
85 majority of taxa originally described following typological species concepts defined around a  
86 century ago (Best et al. 1984; Todd 2008). The relationship between morphological variation  
87 within-species and the environment has been a source of contention since the late 1800s (Todd  
88 2008). Whether this variability is due to different underlying genotypes or plastic phenotypes is  
89 unclear. Evidence supports both scenarios (difference in phenotype e.g.: (Willis 1985; Ayre and  
90 Willis 1988; Todd et al. 2004)– Plastic phenotypes e.g.: (Foster 1979; Miller 1994; Bruno and  
91 Edmunds 1997; Muko et al. 2000; Todd et al. 2004)) and these scenarios are not necessary mutually  
92 exclusive but probable to operate simultaneously (Foster 1979; Amaral 1994; Todd 2008). This has  
93 particular relevance in the face of continuous GCC, that is creating an increasingly unpredictable  
94 wild reef environment.

95

96 Notwithstanding the taxonomic difficulties, the identification of coral species can be challenging  
97 even in optimal ‘wild’ conditions. However, identification requirements are far more than just for

98 well documented field collections, but also cover aquaria collections, that in some cases are held in  
99 conditions dramatically different from the wild. Furthermore customs officials rely in proper  
100 taxonomic identification even at the genera level for threatened taxa by the international wildlife  
101 trade (AC25 Doc. 23 CITES 2011). A status of these identification difficulties in aquaria can be  
102 demonstrated by an analysis of Species360 Zoological Information Management Software (ZIMS),  
103 adopted by more than 95 aquariums in 24 countries. Assuming correct identification ZIMS  
104 indicates c. 42.9% of corals of the orders Scleractinia, Alcyonacea, Helioporacea, Antipatharia,  
105 Corallimorpharia, Pennatulacea, and Zoanthidea in aquaria are identified to genus or higher  
106 taxonomic level (ZIMS list of species holdings – 4th June 2020). Most of the records correspond to  
107 the order Scleractinia, which is also the order with more species represented in aquariums.  
108 Corallimorpharia is, however, the order with the highest number of reported individuals in  
109 aquariums members of the Species360 network (Fig. 1). In addition to this the non-species  
110 associated genera (e.g.: *Acropora* sp.) is usually recorded once in the ZIMS database and most other  
111 aquarium inventory systems, which possibly significantly underestimates the actual number of non-  
112 identified specimens. Moreover, there are currently no confidence values ascribed to any taxonomic  
113 level a collection allocates to a specimen which means that there is likely to mean that a significant  
114 number of species ascribed specimens are actually at the lower end of the confidence spectrum and  
115 would benefit from being reassessed.

116 In many aquariums' corals come from three sources: fragments from other aquaria, via ornamental  
117 trade, or from confiscated and seized shipments (which aquariums are usually asked to  
118 accommodate). All three sources present identification challenges as often exact knowledge from  
119 their wild origin is absent. This specially a challenge for confiscated specimens since they have  
120 none or relatively poor source records, sample integrity, and any other additional background  
121 information that might be of assistance for the identification process. This, together with the  
122 difficulties caused by environmental phenotypic plasticity makes coral identification in aquariums a  
123 particularly challenging task. Data from the Convention on the International Trade of Endangered

124 Species of Flora and Fauna (CITES) shows a total of 4557 instances of coral confiscation from  
125 1982 to 2018 worldwide, for a total of 27027 individual items and 5461 kg per year (CITES data -  
126 <https://trade.cites.org> 02/07/2020). Of these, less than 20% are reported at species level, meaning  
127 that for most cases we know only the genus, family or even order of the specimens confiscated.  
128 Given these challenges CITES requires ideally identification to the order level.

129

### 130 DNA Barcoding

131 An alternative or complementary diagnostic option to morphological identification is genetic  
132 analysis. DNA Barcodes have been proposed by Hebert et al. (Hebert et al. 2003) as a way to  
133 circum-vent the “limitations inherent in morphology-based identification systems”. The core  
134 concept of DNA barcoding is the use of a standard sequence corresponding to a single homologous  
135 region that can be amplified with universal primers that is sufficiently variable to distinguish  
136 between species – usually represented by the mitochondrially encoded cytochrome c oxidase I (MT-  
137 CO1 or CO1 or COX1) (Hebert et al. 2003).

138

139 DNA barcoding is especially attractive as an option for species identification of Scleractinian, as  
140 this method bypasses the problems caused by phenotypic plasticity or life stage (larva, juvenile or  
141 adult). Unfortunately, the proposed ‘universal’ Barcoding region CO1 is at least 10-20 times slower  
142 in Cnidaria than the standard vertebrate mtDNA rate (Van Oppen et al. 1999; Shearer et al. 2002)  
143 with zero interspecific divergence for many species (Shearer and Coffroth 2008). This has led to the  
144 use of a number of different barcoding regions for corals (Shearer et al. 2002).

145 The diverse, reef forming *Acropora* group are widely grown in aquaria and have been a target for  
146 barcoding work. Potential barcodes were reviewed by Shearer et al. (Shearer et al. 2002) examining  
147 both nuclear and mitochondrial regions. Substitution rates of mitochondrial genes in *Acropora* tend  
148 to be lower relative to the nuclear counterparts mentioned by Shearer (i.e. Pax-C intron; internal  
149 transcribed spacer 1 and 2 (ITS) (Shearer et al. 2002). Although, Van Oppen et al. (van Oppen et al.

150 1999) and Vollmer et al. (Vollmer 2002) have highlighted the mitochondrial putative control region  
151 (mtCR) is more variable than the other mitochondrial regions. Subsequently Shearer et al. (Shearer  
152 et al. 2002) compared the genetic divergence of mitochondrial and nuclear regions in Scleractinian,  
153 highlighting how the mtCR region has a similar range of divergence to nuclear coding regions like  
154 the Pax-C intron, but is much slower than the hyper-variable ITS1-2.

155 This study seeks to build on these studies by investigating the utility of DNA barcoding as a method  
156 for species identification of *Acropora* collections in aquaria as part of an integrated diagnostic  
157 approach.

158

## 159 Material and Methods

### 160 Study Area and Collection

161 As part of the “idCoral” project we collected 224 samples across seven institutions (Aquarium de  
162 Paris (France), Chester’s Zoo (UK), Haus des Meeres-Vienna (Austria), Horniman Museum and  
163 Gardens (UK), Royal Burgers’ Zoo (Netherlands), Tierpark Hagenbeck Aquarium (Germany), ZSL  
164 London Zoo (UK)). Branch tip fragments of 2 cm were collected and stored in single ethanol  
165 (+95%) vials labelled with a unique identifier. During the sample collection the colonies were  
166 tagged and photographed with collection dates and tank locations were recorded. The photographs  
167 and tags were also recorded in the “idCoral” database (database - idcoral.org (2020)). After  
168 collection samples were stored at -20°C until extraction, with an initial change of ethanol after 1-2  
169 days aimed at reducing degradation. We analysed 127 *Acropora* samples from the above mentioned  
170 collection.

171

## 172 DNA Extraction, Amplification and Sequencing

173 The DNA extractions were undertaken using the DNeasy PowerSoil Pro Kit from Qiagen<sup>®</sup> with a  
174 modified version of the manufacturer's protocol. An incubation step with proteinase K was added  
175 and the physical breaking of the cell structure with a chemical dissolution was removed from the  
176 protocol as it resulted in excessive shearing of the DNA (Online Resource 1). Extracted DNA was  
177 then preserved at -20°C, and the DNA concentration and quality tested with both Nanodrop assay  
178 and gel electrophoresis. The DNA was diluted to standardise the concentration to between 5 to 20  
179 µg/ml.

180 Two genes, PaxC and mtCR were selected as barcodes based on an assessment of their variability  
181 and availability as reference sequences (Van Oppen et al. 2001; Shearer et al. 2002). The ITS1-2  
182 region was excluded due to the low availability of reference sequences. PCR amplification was  
183 conducted with Q5<sup>®</sup> High-Fidelity DNA Polymerase mixed following manufacturer's indication.  
184 3µl of DNA template and 0.5 µl of Bovine Serum Albumin (BSA)1µg were added, reaching a final  
185 volume of 25µl with RNA free water. For the PaxC gene the primer used were PaxC FP1 5'-TCC  
186 AGA GCA TTA GAG ATG CTG G-3' and PaxC RP1 5'-GGC GAT TTG AGA ACC AAA CCT  
187 GTA-3' (Van Oppen et al. 2001) with a protocol of 98°C for 30s, followed by 31 cycles at 98°C for  
188 10 s, 62°C for 30 s and 72°C for 60 s, ending with a final phase of 72°C for 2min. For the mtCR the  
189 primer used were RNS2: 5'-CAG AGT AAG TCG TAA CAT AG-3' and GR: 5'-AAT TCC GGT  
190 GTG TGT TCT CT-3' (Suzuki et al. 2008) with a protocol of 98°C for 30s, followed by 40 cycles  
191 at 98°C for 10 s, 62°C for 15 s and 72°C for 60 s, ending with a final phase of 72°C for 5min.

192 Successful PCR amplifications (assessed by gel electrophoresis) were sent to Eurofins Genomics  
193 for PCR cleaning and custom Sanger sequencing on both the forward and the reverse primers using  
194 cycle sequencing technology (dideoxy chain termination / cycle sequencing) on ABI 3730XL



195 sequencing machines. The returned sequences were manually trimmed in order to remove poor  
196 quality sections and assembled using Geneious Prime<sup>®</sup> (2019.1.2.).

197

## 198 Identification

### 199 Taxonomy

200 Both the barcode gap and specimen identifications were initially performed at the species level, but  
201 were also performed at the level of species group based on the revision of *Acropora* by Wallace et  
202 al. (Wallace et al. 2012).

203

### 204 Barcoding Gap

205 References sequences for the two targeted regions were collated. FASTA files were created with the  
206 records matching the following query on GenBank: mtCR="Acroporidae"[Organism] AND  
207 mitochondrial "complete genome" OR "control region" OR "putative control region" OR  
208 mitochondrial control region"; PaxC="Acroporidae"[Organism] AND PaxC[gene] OR pax-  
209 c[gene]". Two multiple alignments were performed, one for each gene, using the Geneious<sup>®</sup>  
210 algorithm (progressive pairwise aligner) and trimmed. For both the produced references alignments  
211 distance matrices were calculated using the function `dist.dna` (R package `ape` (Jombart et al. 2017))  
212 and with different models (Raw ; JC69; K80; K81; F84; BH87; paralin; indel Y; indelblock).  
213 Successively the frequency distribution of intra/inter-specific distances was plotted. The quantile  
214 function (R package "stats") was used to define the 99; 50; 1% quantile confidence interval used in  
215 the blast match analysis. Note: the two alignments were constructed and used only for the specific  
216 purposes of examining the barcoding gap for the targeted region and determining potential  
217 confidence interval for the blast match analysis.

218

219 **Blast match**

220 Query based specimen identification with blast match (Benson 2000) was determined using a  
221 custom Blastn database. All records from the query “Acroporidae”[Organism]” on GenBank were  
222 downloaded and included in the local database built with the packages rBLAST (Hahsler and Nagar  
223 2019) and rentrez (Winter 2017). A local Blast match (Camacho et al. 2009) was ultimately  
224 performed. To filter for species match with identical scores a decision tree (Fig. 2) was designed  
225 relying on Bit score, Percentage identity, and number of mismatches. Matches shorter than 2/3 of  
226 the original sample sequence query were removed. The decision tree prioritised 100% pairwise  
227 identity matches were possible, then to the highest bit score, then lowest number of base  
228 mismatches. 100% pairwise identity matches to a species group rather than a single species name  
229 were prioritised over single species name matches with lower pairwise identity with higher bit  
230 score. We confronted the match from the two targeted regions to obtain a single most probable ID.  
231 To account for conflicting matches between the two region we relied on the 99; 50; 1% quantile  
232 distribution of the intraspecific distances obtained from the barcoding gap analysis. Using pairwise  
233 identity threshold as confidence intervals to discern which region offers the better match for the ID  
234 (R-scripts as Online Resource 3 and 4).

235

## 236 **Results**

237 From the 127 collected samples all were successfully extracted and, 107 mtCR and 100 PaxC had a  
238 successful DNA amplification, respectively 84% and 79% with a 76 samples overlap between the  
239 two region (Table 1). 348 reads were successfully sequenced, 84 mtCR sample and 90 PaxC. The  
240 median sequence lengths were 734 post assembly for the mtCR region and 649 for the PaxC region  
241 (Table 1).

242

## 243 **Barcoding**

244 Our GenBank query produced a total of 1348 mtCR sequences and 427 PaxC sequences. The mtCR  
245 references query, once cleaned for clones, produced a 579 sequences alignment of 914bp. The PaxC  
246 references query produced a 352 sequence alignment of 770 bp.

247

248 The mtCR alignment of 579 sequences resulted in a matrix of 335 241 pairwise genetic distances,  
249 grouped by 57 species names. 6.4% of these (21 471) are intraspecific distances, while 93.6% (313  
250 770) are interspecific distances (Fig. 3A). The PaxC alignment of 352 sequences resulted in a  
251 matrix of 123 904 genetic distances, grouped by 55 species names. 3% of these (3 726) are  
252 intraspecific distances, while 97% (120 178) are interspecific distances (Fig. 3B). Between the two  
253 groups there is an overlap of 49 species names. Table 3 and 4 with the sources of the sequences  
254 used in these alignments.

255

256 Fig. 3 highlights in blue the intraspecific variation (sequences with the same name on GenBank)  
257 and in the light green the interspecific distances (sequences with different names on GenBank). In  
258 both Fig. 3A) mtCR and 3B) PaxC we see no discernable barcoding gap.

259

260 The quantile within species distribution produce the following distance threshold for our confidence  
261 interval: mtCR 0.027 (99%); 0.0068 (50%); 0 (1%) and PaxC 0.17 (99%); 0.014 (50% ); 0 (1%).

262

263 In Fig. 4 and 5, for the mtCR and the PaxC respectively, we can see the above mentioned uneven  
264 distribution of the GenBank records towards specific species and species groups. With example like  
265 species group *humilis* showing 4 times the frequency of less represented species group like *loripes*.

266

## 267 Blast match

268 The local database for blast matching contained 510826 sequences. In Table 2 we see that 23 of our  
269 76 samples (with both regions sequenced) were uniquely identified to a single species, while 13  
270 samples matched to conflicting names. 20 of our samples had a unique species name match for the  
271 PaxC region but mtCR region matched to 2 or more names with all but 6 of these including the  
272 matching PaxC name. Very few samples matched to multiple species for both regions (4).

273

274 We have 47 % of samples matching to a single species name with both regions, 5% with the same  
275 identical match. While we have 42% of the matches to a single species name that are in conflict,  
276 25% of these conflicts are resolvable (i.e.: one of the two region with a match better fitting than the  
277 other one, based on the defined confidence thresholds of each region). Similar results for the other  
278 sample matching for two or more in at least one of the two region. Out of the 76 samples, in 15  
279 cases we observe the second region adding information to the first ones (Table 5 as Online  
280 Resource 2). Mainly from a mtCR multi name ID to a single PaxC name (i.e.: sample P269 has 7  
281 mtCR identical matches to 7 different species names, and the PaxC matches at a lower rate to only  
282 one of them). In addition, the second region functions as backup option whenever one of the two  
283 falls too short (5/76 sample have too low-quality match to be trusted independently).

284

285 The complete list of our current best species name match, with species group information and  
286 detailed genetic info is provided as Online Resource (Table 5 – Online Resource).

287

## 288 Discussion

### 289 Barcoding gap

290 Using DNA barcodes to identify unknown samples is only achievable if a well- studied, well-  
291 sampled reference sequence database is available (Meyer and Paulay 2005), and even though

292 databases such as GenBank (which comprises the DNA DataBank of Japan (DDBJ), the European  
293 Nucleotide Archive (ENA), and GenBank at NCBI - <http://www.ncbi.nlm.nih.gov/genbank>) and  
294 BOLD (Barcode Of Life Data System - <http://www.boldsystems.org>) contain an ever increasing  
295 number of species-level identified sequences (i.e.: 216 531 829 total sequences on GenBank as  
296 April 2020), these databases are far from complete. The open nature of GenBank is destined to  
297 produce a bias towards species with a higher research interest (i.e.: Human sequences constitute  
298 56% of the total sequences on GenBank (Benson 2000)). The genus focus of our study, *Acropora*, is  
299 one of the more commonly studied and widespread hard corals in the ocean (Wallace 1999; Fukami  
300 et al. 2000) making it one of the most covered coral genera in GenBank. The reality is that even for  
301 a widely studied group such as *Acropora* we can observe a disparity in the number of sequences  
302 available for each species name (Fig. 4 and 5). The best example of this is the delta between two  
303 species group: group *humilis* being the most sampled (251 mtCR and 61 PaxC references sequences  
304 from our query) and group *robusta* one of the least sampled (11 mtCR and 13 PaxC references  
305 sequences from our query). Note that both species group are formed by of the same number of  
306 species (8 species each (Wallace et al. 2012)). This disparity is intrinsic to the nature of these public  
307 repertoires, as species of higher interest will always be more studied than others, creating the  
308 necessity to acknowledge the potential bias when using these resources for identification purposes.

309

310 From our analysis we could not identify a clear barcoding gap in both our targeted regions (Fig. 3),  
311 and furthermore we can observe a total overlap of the intra-specific distances by the inter-specific  
312 distances. For both our targeted regions, even if more evident in the mtCR (Fig. 3A), we see that the  
313 inter-specific distances follow a distribution reminiscent of a more common and more expected  
314 barcoding distribution. We performed the same barcoding gap analysis at the higher taxonomic  
315 level using the species group information without obtaining a noticeable difference. With the lack  
316 of a clear Barcoding gap, and accounting for the extensive criticism present in the literature: For the  
317 use of distances in taxonomy and systematics (Ferguson 2002; Lee 2004; Moritz and Cicero 2004;

318 DeSalle et al. 2005; Prendini 2005; Knapp et al. 2005; Meyer and Paulay 2005; Cognato 2006;  
319 Hickerson et al. 2006; Little and Stevenson 2007; Meier et al. 2008); for the drawbacks of using  
320 GenBank data (Meier et al. 2006); for the evidence of different rates of evolution in Scleractinian  
321 (Van Oppen et al. 1999; Shearer et al. 2002; Kitahara et al. 2010). We cannot establish a simple  
322 distance base threshold to use for our identification purposes, leading us to depend more on the  
323 blast match.

324

325 Another potential issue with the use of these methods of identification is the source of the reference  
326 sequences. With databases like GenBank, with little or no review on the uploaded information, the  
327 question is the confidence that the initial identification of the now available reference sequences is  
328 indeed correct (James Harris 2003). In our specific case after the processing we performed for the  
329 mtCR reference alignment, out of the total 579 included 42% (242 sequences) come from a single  
330 doctoral thesis project, while 5.4% (33 sequences) are from unpublished papers (Table 3). For the  
331 PaxC 16% (58 sequences) are from unpublished papers, and another 39% (138 sequences) from a  
332 single paper (Richards et al. 2008) (Table 4). Highlighting clearly the need for more study on the  
333 subject to increase the number of potential sources, and alleviate the possible bias of a “single  
334 observer”.

335

### 336 **Blast match**

337 The use of query match with blast is far from being a complete solution, with 26 out of 76 samples  
338 without a single species or species group resolved ID (Table 5), we have proposed a theoretical  
339 decision tree that standardise the choice when there is a need of sorting through the output of a  
340 multi-species name blast match (Fig. 2). In addition we used two different regions, a mitochondrial  
341 one and a nuclear one to increase the confidence in our results (Suzuki et al. 2008). Our proposed  
342 species ID are provisional and subject to revision when more species and sequences are available,  
343 hence the value of a repeatable process for matching and re-matching.

344

345 All methods of identification that relay on DNA barcodes (e.g.: Blast matching, Barcoding Gap  
346 analysis, etc.) use genetic divergence thresholds to assign individuals to correct species. This based  
347 on two fundamental assumptions 1) monophyly of species with respect of the molecular marker  
348 used, and 2) intraspecific genetic divergence is much smaller than interspecific genetic differences  
349 (Toffoli et al. 2008). The first assumption is more dependent on the experimental choices made (i.e.  
350 sequence region selected). The second assumption is where most of the criticism of barcodes  
351 methods lies, on not comparing sister species or geographical distribution thus, underestimating  
352 intraspecific genetic variability (Moritz and Cicero 2004; Toffoli et al. 2008). Fundamentally, the  
353 issue of using thresholds lies in the fact that species naturally embodies an evolutionary process,  
354 being subject to demographic and selective processes that will act on the genetic diversity (e.g.  
355 (Avice et al. 2000; Hey 2001; Coyne and Orr 2004; Toffoli et al. 2008)). Since species are real  
356 evolutionary groups and not categories which are created as a direct function of perceived  
357 distinction (Hey 2001), the use of thresholds in “discovering” new species is overly simplistic, and  
358 in some cases even misleading (Toffoli et al. 2008). We argue against simply substituting  
359 morphology based taxonomy with DNA barcoding based taxonomy, as each system is more adapt  
360 to answer different questions (Toffoli et al. 2008). Correct assignment is thus only possible by  
361 complementing DNA barcoding with other data types, such as morphological, and ecological  
362 characters as part of an integrated diagnostic approach (Toffoli et al. 2008).

363

364 While the simple blast match is inheritably less complex than other traditional DNA barcodes  
365 identification methods (i.e.: the above mentioned barcoding gap analysis and, the potentially more  
366 direct Automatic Barcoding Gap Discovery (ABGD) (Puillandre et al. 2012)). The argument we  
367 make is that given the shared limitation and the common need for additional data in an integrated  
368 approach, a faster and simpler blast match provides a relatively similar additional amount of  
369 information for the species identification while being more easily repeatable, especially considering

370 the value standardized data among aquariums (da Silva et al. 2019) and in light of the ever  
371 increasing quantity of reference materials being added to GenBank and BOLD.

372

373 The reality is that barcoding as an independent tool of identification has its clear limitation (Van  
374 Oppen et al. 1999; Shearer et al. 2002; Ferguson 2002; Moritz and Cicero 2004; Lee 2004; DeSalle  
375 et al. 2005; Meyer and Paulay 2005; Prendini 2005; Knapp et al. 2005; Cognato 2006; Hickerson et  
376 al. 2006; Meier et al. 2006, 2008; Little and Stevenson 2007; Kitahara et al. 2010), and coral  
377 barcoding is no exception. With some of the concern on the use of genetic repertoires in common of  
378 both the methods explored in this study, we strongly recommend an integrated diagnostic approach,  
379 combining morphological and genetic means of identification, in agreement with C. Moritz in  
380 “DNA Barcoding: Promise and Pitfalls” (Moritz and Cicero 2004). Proposing the use of barcoding  
381 and query matching as an additional tool for identification, increasing confidence of experts and  
382 both confidence and capacity of non-experts taxonomist. Producing this way reliably identified  
383 sequences that can potentially become new reference, adding to the repertoires already freely  
384 available. Considering the specific needs of the aquarium community and their critical role to  
385 support corals conservation (i.e., by hosting at least 24% of the corals assessed as highly vulnerable  
386 to climate change (da Silva et al. 2019)), we emphasise the value of integrating standardised  
387 barcoding analysis, and specimen morphology photographs to optimise usage of authoritative  
388 identification guides and expert opinion.

389

## 390 **Acknowledgments**

391 Genetic analysis costs were partly covered by a FAITAG genetics fund grant an initiative from the  
392 EAZA (European Association of Zoos and Aquaria) and EUAC (European Union of Aquarium  
393 Curators) Fish and Aquatic Invertebrate Taxon Advisory Group (FAITAG).



394 **Conflict of interest**

395 On behalf of all authors, the corresponding author states that there is no conflict of interest.

396

397 *Fig. 1: Number of records from member institutions of the Species360 network at genus or higher*  
398 *level (i.e. order, family and genus) and at species or lower level (i.e. species and subspecies). This*  
399 *information is based on the “rank” field from the holdings information reported by each institution*  
400 *through the ZIMS software. Information downloaded from ZIMS (Species360, 2020) on 4th June*  
401 *2020.*

402

403 *Fig. 2: Decision tree for conflict solving based on Pairwise percentage identity, Bit score and*  
404 *number of mismatches.*

405

406 *Fig. 3: Barcoding gap (raw distance matrix frequency distribution). A) mtCR max distance =*  
407 *0.0877 minimum distance = 0 (Bin size=0.002) B) PaxC max distance = 0.5895 minimum distance*  
408 *= 0 (Bin size =0.05)*

409

410 *Fig. 4: Number of mtCR references sequences with the same species name by species group*

411

412 *Fig. 5: Number of PaxC references sequences with the same species name by species group*

413

## 414 Bibliography

415

416 Amaral FD (1994) Morphological variation in the reef coral *Montastrea cavernosa* in Brazil. Coral  
417 Reefs 13:113–117

418 Avise JC, Baker RJ, Porter CA, Patton JC, Van Den Bussche RA, Ballard JW, Chemoff B, James  
419 AC (2000) Phylogeography: the history and formation of species. Harvard university press,

420 Ayre DJ, Willis BL (1988) Population structure in the coral *Pavona cactus*: clonal genotypes show  
421 little phenotypic plasticity. Mar Biol 99:495–505

422 Bellwood DR, Hughes TP (2001) Regional-scale assembly rules and biodiversity of coral reefs.  
423 Science (80- ) 292:1532–1534

424 Benson DA (2000) GenBank. Nucleic Acids Res 28:15–18

425 Best, Borel M, G. J. Boekschoten, Oosterbaan A (1984) Species concept and ecomorph variation in  
426 living and fossil Scleractinia. Palaeontogr Am 54 70–79

427 Borneman E (2008) Introduction to the husbandry of corals in aquariums□: A review. Adv coral  
428 Husb public aquariums, Leewis, RJ Janse, M 2:3–14

429 Brondizio ES, Settele J, Diaz S, Others (2019) IPBES. 2019 Global assessment report on  
430 biodiversity and ecosystem services of the Intergovernmental Science-Policy Platform on  
431 Biodiversity and Ecosystem Services. Bonn, Ger

432 Brunner B (2012) The Ocean at Home: an illustrated history of the aquarium. Reaktion Books,

433 Bruno JF, Edmunds PJ (1997) Clonal variation for phenotypic plasticity in the coral *Madracis*  
434 *mirabilis*. Ecology 78:2177–2190

435 Camacho C, Coulouris G, Avagyan V, Ma N, Papadopoulos J, Bealer K, Madden TL (2009)  
436 BLAST+: Architecture and applications. BMC Bioinformatics 10:1–9

437 Cognato AI (2006) Standard Percent DNA Sequence Difference for Insects Does Not Predict  
438 Species Boundaries. J Econ Entomol 99:1037–1045

439 Cowburn B, Samoilys MA, Obura D (2018) The current status of coral reefs and their vulnerability  
440 to climate change and multiple human stresses in the Comoros Archipelago, Western Indian  
441 Ocean. Mar Pollut Bull 133:956–969

442 Coyne JA, Orr HA (2004) Speciation Sinauer Associates. Sunderland, MA 276:281

443 DeSalle R, Egan MG, Siddall M (2005) The unholy trinity: Taxonomy, species delimitation and  
444 DNA barcoding. Philos Trans R Soc B Biol Sci 360:1905–1916

445 Ferguson JWH (2002) On the use of genetic divergence for identifying species. Biol J Linn Soc  
446 75:509–516

447 Fisher R, O’Leary RA, Low-Choy S, Mengersen K, Knowlton N, Brainard RE, Caley MJ (2015)  
448 Species richness on coral reefs and the pursuit of convergent global estimates. Curr Biol  
449 25:500–505

450 Foster AB (1979) Phenotypic plasticity in the reef corals *Montastraea annularis* (Ellis & Solander)  
451 and *Siderastrea siderea* (Ellis & Solander). J Exp Mar Bio Ecol 39:25–54

452 Fukami H, Omori M, Hatta M (2000) Phylogenetic Relationships in the Coral Family *Acroporidae*,  
453 Reassessed by Inference from Mitochondrial Genes. Zoolog Sci 17:689–696

454 Godfray HCJ (2002) Challenges for taxonomy. Nature 417:17–19

- 455 Hahsler M, Nagar A (2019) rBLAST:Interface to the Basic Local Alignment Search Tool (BLAST).
- 456 Hebert PDN, Cywinska A, Ball SL, DeWaard JR (2003) Biological identifications through DNA  
457 barcodes. *Proc R Soc B Biol Sci* 270:313–321
- 458 Hey J (2001) Genes, categories, and species: The evolutionary and cognitive cause of the species  
459 problem. Oxford University Press,
- 460 Hickerson MJ, Meyer CP, Moritz C (2006) DNA barcoding will often fail to discover new animal  
461 species over broad parameter space. *Syst Biol* 55:729–739
- 462 Hoegh-Guldberg O, Poloczanska ES, Skirving W, Dove S (2017) Coral Reef Ecosystems under  
463 Climate Change and Ocean Acidification. *Front Mar Sci* 4:158
- 464 Horton T, Kroh A, Ah Yong S, Bailly N, Boyko CB, Brandão SN, Gofas S, Hooper JNA, Hernandez  
465 F, Holovachov O, Mees J, Molodtsova TN, Paulay G, Decock W, Dekeyser S, Lanssens T,  
466 Vandepitte L, Vanhoorne B, Adlard R, Adriaens P, Agatha S, Ahn KJ, Akkari N, Alvarez B,  
467 Anderberg A, Anderson G, Angel M V, Antic D, Arango C, Artois T, Atkinson S, Baldwin  
468 BG, Bank R, Barber A, Barbosa JP, Bartsch I, Bellan-Santini D, Bergh N, Bernot J, Berta A,  
469 Bezerra TN, Bieler R, Blanco S, Blasco-Costa I, Blazewicz M, Bock P, de León M, Böttger-  
470 Schnack R, Bouchet P, Boury-Esnault N, Boxshall G, Bray R, Bruce NL, Cairns S, Calvo  
471 Casas J, Carballo JL, Cárdenas P, Carstens E, Chan BK, Chan TY, Cheng L, Churchill M,  
472 Coleman CO, Collins AG, Collins GE, Corbari L, Cordeiro R, Cornils A, Coste M, Costello  
473 MJ, Crandall KA, Cremonte F, Cribb T, Cutmore S, Dahdouh-Guebas F, Daly M, Daneliya M,  
474 Dauvin JC, Davie P, De Broyer C, De Grave S, de Mazancourt V, de Voogd NJ, Decker P,  
475 Decraemer W, Defaye D, d’Hondt JL, Dippenaar S, Dohrmann M, Dolan J, Domning D,  
476 Downey R, Ector L, Eisendle-Flöckner U, Eitel M, Encarnação SC d., Enghoff H, Epler J,  
477 Ewers-Saucedo C, Faber M, Feist S, Figueroa D, Finn J, Fišer C, Fordyce E, Foster W, Frank  
478 JH, Fransen C, Freire S, Furuya H, Galea H, Gao T, Garcia-Alvarez O, Garcia-Jacas N, Garic  
479 R, Garnett S, Gasca R, Gaviria-Melo S, Gerken S, Gibson D, Gibson R, Gil J, Gittenberger A,  
480 Glasby C, Glover A, Gómez-Noguera SE, González-Solís D, Gordon D, Gostel M, Grabowski  
481 M, Gravili C, Guerra-García JM, Guidetti R, Guiry MD, Gutierrez D, Hadfield KA, Hajdu E,  
482 Hallermann J, Hayward BW, Heiden G, Hendrycks E, Herbert D, Herrera Bachiller A, Ho J s.,  
483 Hodda M, Høeg J, Hoeksema B, Houart R, Hughes L, Hyžný M, Iniesta LFM, Iseto T,  
484 Ivanenko S, Iwataki M, Janssen R, Jarms G, Jaume D, Jazdzewski K, Jersabek CD, Józwiak P,  
485 Kabat A, Kantor Y, Karanovic I, Karthick B, Katinas L, Kim YH, King R, Kirk PM, Klautau  
486 M, Kocielek JP, Köhler F, Kolb J, Kotov A, Kremenetskaia A, Kristensen RM, Kulikovskiy  
487 M, Kullander S, Lambert G, Lazarus D, Le Coze F, LeCroy S, Leduc D, Lefkowitz EJ,  
488 Lemaitre R, Lichter-Marck IH, Liu Y, Loeuille B, Lörz AN, Lowry J, Ludwig T, Lundholm N,  
489 Macpherson E, Madin L, Mah C, Mamo B, Mamos T, Manconi R, Mapstone G, Marek PE,  
490 Marshall B, Marshall DJ, Martin P, Mast R, McFadden C, McInnes SJ, Meidla T, Meland K,  
491 Merrin KL, Messing C, Miljutin D, Mills C, Moestrup Ø, Mokievsky V, Monniot F, Mooi R,  
492 Morandini AC, da Rocha R, Morrow C, Mortelmans J, Mortimer J, Musco L, Nesom G,  
493 Neubauer TA, Neubert E, Neuhaus B, Ng P, Nguyen AD, Nielsen C, Nishikawa T, Norenburg  
494 J, O’Hara T, Opresko D, Osawa M, Osigus HJ, Ota Y, Páll-Gergely B, Panero JL, Pasini E,  
495 Patterson D, Paxton H, Pelsler P, Peña-Santiago R, Perrier V, Perrin W, Petrescu I, Picton B,  
496 Pilger JF, Pisera AB, Polhemus D, Poore GC, Potapova M, Pugh P, Read G, Reich M, Reimer  
497 JD, Reip H, Reuscher M, Reynolds JW, Richling I, Rimet F, Ríos P, Rius M, Rogers DC,  
498 Roque N, Rosenberg G, Rützler K, Sabbe K, Saiz-Salinas J, Sala S, Santagata S, Santos S, Sar  
499 E, Satoh A, Saucède T, Schatz H, Schierwater B, Schilling E, Schmidt-Rhaesa A, Schneider S,  
500 Schönberg C, Schuchert P, Senna AR, Serejo C, Shaik S, Shamsi S, Sharma J, Shear WA,  
501 Shenkar N, Shinn A, Short M, Sicinski J, Sierwald P, Simmons E, Sinniger F, Sivell D, Sket  
502 B, Smit H, Smit N, Smol N, Souza-Filho JF, Spelda J, Sterrer W, Stienen E, Stoev P, Stöhr S,  
503 Strand M, Suárez-Morales E, Summers M, Suppan L, Susanna A, Suttle C, Swalla BJ, Taiti S,

- 504 Tanaka M, Tandberg AH, Tang D, Tasker M, Taylor J, Taylor J, Tchesunov A, ten Hove H, ter  
505 Poorten JJ, Thomas JD, Thuesen E V, Thurston M, Thuy B, Timi JT, Timm T, Todaro A,  
506 Turon X, Tyler S, Uetz P, Uribe-Palomino J, Urtubey E, Utevsky S, Vacelet J, Vachard D,  
507 Vader W, Väinölä R, Valls Domedel G, de Vijver B, van der Meij SE, van Haaren T, van  
508 Soest RW, Vanreusel A, Venekey V, Vinarski M, Vonk R, Vos C, Walker-Smith G, Walter  
509 TC, Watling L, Wayland M, Wesener T, Wetzal CE, Whipps C, White K, Wieneke U,  
510 Williams DM, Williams G, Wilson R, Witkowski A, Witkowski J, Wyatt N, Wylezich C, Xu  
511 K, Zanol J, Zeidler W, Zhao Z (2020) World Register of Marine Species (WoRMS).
- 512 Hughes TP, Connolly SR, Eakin CM, Dietzel A, McWilliam MJ, Hoey AS, Pears RJ, Liu G,  
513 Skirving WJ, Heron SF, Pratchett MS, Baird AH, Stella JS, Hoogenboom MO, Torda G, Kerry  
514 JT (2018) Global warming transforms coral reef assemblages. *Nature* 556:492–496
- 515 James Harris D (2003) Can you bank on GenBank? *Trends Ecol Evol* 18:317–319
- 516 Jombart T, Kamvar ZN, Schliep K, Archer E, Harris R (2017) apex: Phylogenetic Methods for  
517 Multiple Gene Data.
- 518 Kitahara M V., Cairns SD, Stolarski J, Blair D, Miller DJ (2010) A comprehensive phylogenetic  
519 analysis of the *scleractinia* (*Cnidaria*, *Anthozoa*) based on mitochondrial CO1 sequence data.  
520 *PLoS One* 5:
- 521 Knapp S, Lughadha EN, Paton A, Mallet J, Isaac NJB, MacE GM, James Harris D, Froufe E (2005)  
522 Taxonomic inflation, species concepts and global species lists (multiple letters). *Trends Ecol*  
523 *Evol* 20:7–8
- 524 Lee MSY (2004) The molecularisation of taxonomy. *Invertebr Syst* 18:1–6
- 525 Little DP, Stevenson DW (2007) A comparison of algorithms for the identification of specimens  
526 using DNA barcodes: Examples from gymnosperms. *Cladistics* 23:1–21
- 527 Masson-Delmotte V, Zhai P, Pörtner H-O, Roberts D, Skea J, Shukla PR, Pirani A, Moufouma-  
528 Okia W, Péan C, Pidcock R, Connors S, Matthews JBR, Chen Y, Zhou X, Gomis MI, Lonnoy  
529 E, Maycock T, Tignor M, Waterfield T (2018) IPCC Special Report on the impacts of global  
530 warming of 1.5°C above pre-industrial levels and related global greenhouse gas emission  
531 pathways, in the context of strengthening the global response to the threat of climate change,  
532 sustainable development, an. *Sustain Dev Efforts to Eradicate Poverty* [https://www](https://www.ipcc.ch/sr15/)  
533 [ipcc.ch/sr15/](https://www.ipcc.ch/sr15/) 1:
- 534 Meier R, Shiyang K, Vaidya G, Ng PKL (2006) DNA barcoding and taxonomy in diptera: A tale of  
535 high intraspecific variability and low identification success. *Syst Biol* 55:715–728
- 536 Meier R, Zhang G, Ali F (2008) The use of mean instead of smallest interspecific distances  
537 exaggerates the size of the “barcoding gap” and leads to misidentification. *Syst Biol* 57:809–  
538 813
- 539 Meyer CP, Paulay G (2005) DNA barcoding: Error rates based on comprehensive sampling. *PLoS*  
540 *Biol* 3:e422
- 541 Miller KJ (1994) Morphological variation in the coral genus *Platygyra* - Environmental influences  
542 and taxonomic implications. *Mar Ecol Prog Ser* 110:19–28
- 543 Mora C, Tittensor DP, Adl S, Simpson AGB, Worm B (2011) How many species are there on earth  
544 and in the ocean? *PLoS Biol* 9:1–8
- 545 Mora C, Tittensor DP, Myers RA (2008) The completeness of taxonomic inventories for describing  
546 the global diversity and distribution of marine fishes. *Proc R Soc B Biol Sci* 275:149–155
- 547 Moritz C, Cicero C (2004) DNA Barcoding: Promise and Pitfalls. *PLoS Biol* 2:e354

- 548 Muko S, Kawasaki K, Sakai K, Takasu F, Shigesada N (2000) Morphological plasticity in the coral  
549 *Porites sillimaniani* and its adaptive significance. Bull Mar Sci 66:225–239
- 550 van Oppen MJH, Hislop NR, Hagerman PJ, Miller DJ (1999) Gene Content and Organization in a  
551 Segment of the Mitochondrial Genome of the *Anthozoan Subclass Zoantharia*. Mol Biol Evol  
552 16:1812–1815
- 553 Van Oppen MJHH, McDonald BJ, Willis B, Miller DJ (2001) The evolutionary history of the coral  
554 genus *acropora* (*Scleractinia*, *Cnidaria*) based on a mitochondrial and a nuclear marker:  
555 Reticulation, incomplete lineage sorting, or morphological convergence? Mol Biol Evol  
556 18:1315–1329
- 557 Van Oppen MJHH, Willis BL, Miller DJ (1999) Atypically low rate of cytochrome b evolution in  
558 the *scleractinian* coral genus *Acropora*. Proc R Soc London Ser B Biol Sci 266:179–183
- 559 Pratchett MS, Pisapia C, Sheppard CRC (2013) Background mortality rates for recovering  
560 populations of *Acropora cytherea* in the Chagos Archipelago, central Indian Ocean. Mar  
561 Environ Res 86:29–34
- 562 Prendini L (2005) Comment on “Identifying spiders through DNA barcodes.” Can J Zool 83:498–  
563 504
- 564 Puillandre N, Lambert A, Brouillet S, Achaz G (2012) ABGD, Automatic Barcode Gap Discovery  
565 for primary species delimitation. Mol Ecol 21:1864–1877
- 566 Richards ZT, van Oppen MJH, Wallace CC, Willis BL, Miller DJ (2008) Some rare Indo-Pacific  
567 coral species are probable hybrids. PLoS One 3:1–8
- 568 Rinkevich B (1995) Restoration Strategies for Coral Reefs Damaged by Recreational Activities:  
569 The Use of Sexual and Asexual Recruits. Restor Ecol 3:241–251
- 570 Shearer TL, Coffroth MA (2008) DNA BARCODING: Barcoding corals: limited by interspecific  
571 divergence, not intraspecific variation. Mol Ecol Resour 8:247–255
- 572 Shearer TL, van Oppen MJH, Romano SL, Wörheide G (2002) Slow mitochondrial DNA sequence  
573 evolution in the *Anthozoa* (*Cnidaria*). Mol Ecol 11:2475–2487
- 574 Sheppard C, Sheppard A, Fenner D (2020) Coral mass mortalities in the Chagos Archipelago over  
575 40 years: Regional species and assemblage extinctions and indications of positive feedbacks.  
576 Mar Pollut Bull 154:111075
- 577 da Silva R, Pearce-Kelly P, Zimmerman B, Knott M, Foden W, Conde DA (2019) Assessing the  
578 conservation potential of fish and corals in aquariums globally. J Nat Conserv 48:1–11
- 579 Suzuki G, Hayashibara T, Shirayama Y, Fukami H (2008) Evidence of species-specific habitat  
580 selectivity of *Acropora* corals based on identification of new recruits by two molecular  
581 markers. Mar Ecol Prog Ser 355:149–159
- 582 Todd PA (2008) Morphological plasticity in *scleractinian* corals. Biol Rev 83:315–337
- 583 Todd PA, Sidle RC, Lewin-Koh NJI (2004) An aquarium experiment for identifying the physical  
584 factors inducing morphological change in two massive *scleractinian* corals. J Exp Mar Bio  
585 Ecol 299:97–113
- 586 Toffoli D, Hrbek T, de Araújo MLG, de Almeida MP, Charvet-Almeida P, Farias IP (2008) A test  
587 of the utility of DNA barcoding in the radiation of the freshwater stingray genus *Potamotrygon*  
588 (*Potamotrygonidae*, *Myliobatiformes*). Genet Mol Biol 31:324–336
- 589 Veron JEN, Stafford-Smith MG, Turak E, L.M. D (2020) Corals of the World.  
590 <http://www.coralsoftheworld.com>

- 591 Vollmer S V. (2002) Hybridization and the Evolution of Reef Coral Diversity. *Science* (80- )  
592 296:2023–2025
- 593 Wallace CC (1999) Staghorn corals of the world: a revision of the coral genus *Acropora*  
594 (*Scleractinia; Astrocoeniina; Acroporidae*) worldwide, with emphasis on morphology,  
595 phylogeny and biogeography. CSIRO publishing.
- 596 Wallace CC, Done BJ, Muir PR (2012) Revision and catalogue of worldwide staghorn corals  
597 *acropora* and *isopora* (scleractinia: *Acroporidae*) in the museum of tropical Queensland. *Mem*  
598 *Queensl Museum* 57:1–257
- 599 Wallace CC, Willis BL (1994) Systematics of the coral genus *Acropora*: implications of new  
600 biological findings for species concepts. *Annu Rev Ecol Syst* 25:237–262
- 601 Willis BL (1985) Phenotypic plasticity versus phenotypic stability in the reef corals *Turbinaria*  
602 *mesenterina* and *Pavona cactus*. *Proc Fifth Int Coral Reef Symp Vol. 4*:
- 603 Winter DJ (2017) rentrez: An R package for the NCBI eUtils API. *R J* 9:520–526  
604 (2020) idCoral.org. <https://idcoral.org>  
605

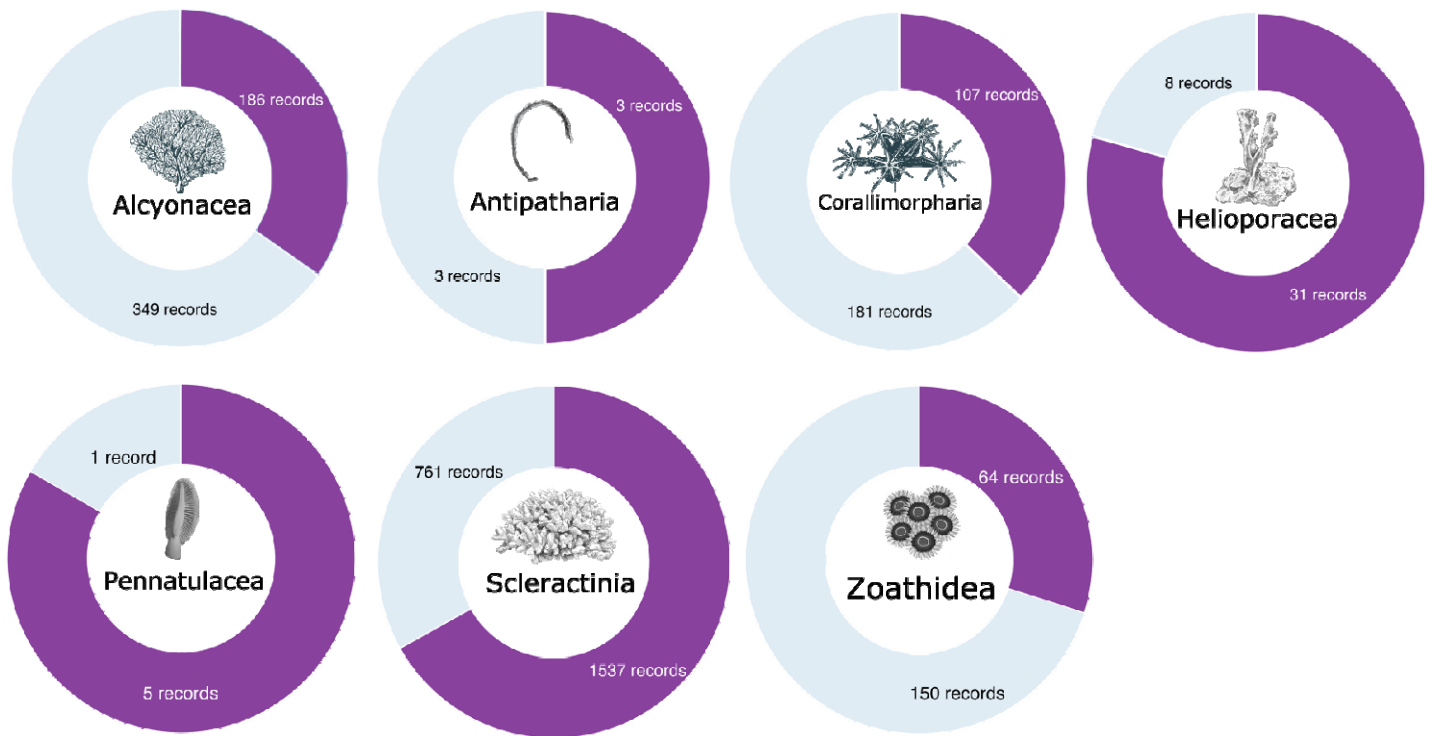

Figure 1: Number of records from member institutions of the Species360 network at genus or higher level in light blue (i.e. order, family and genus) and at species or lower level in purple (i.e. species and subspecies). This information is based on the rank field from the holdings information reported by each institution through the ZIMS software. Information downloaded from ZIMS (Species360, 2020) on 4<sup>th</sup> June 2020.



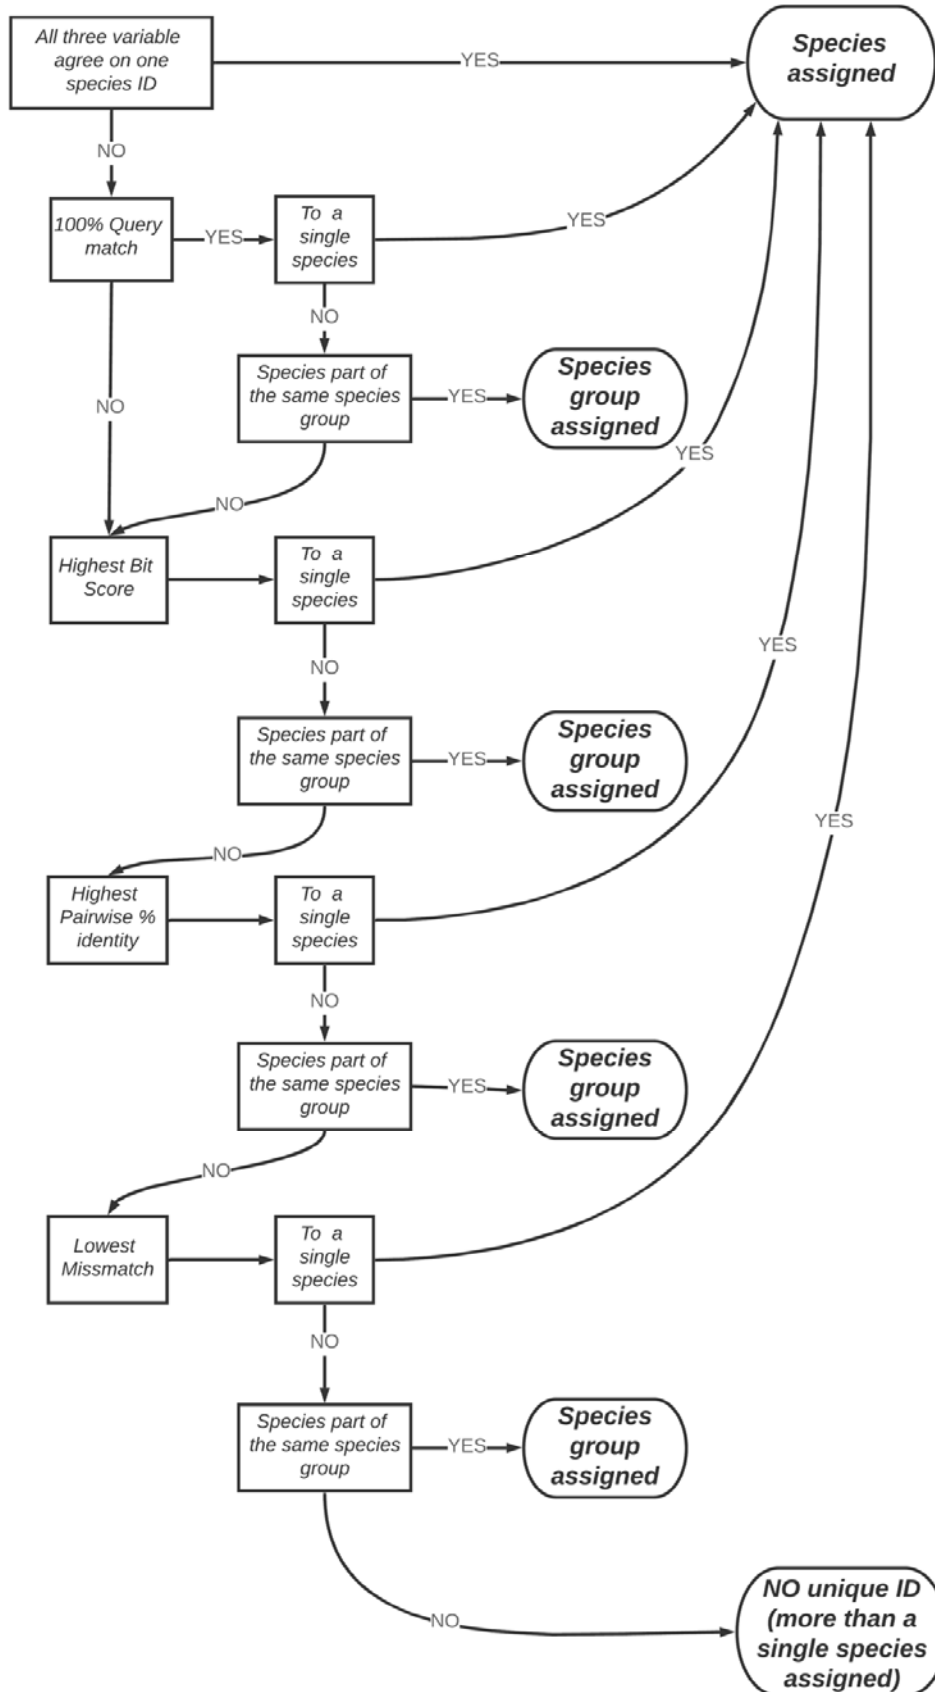

Figure 2: Decision tree for conflict solving based on Pairwise percentage identity, Bit score and number of mismatches.

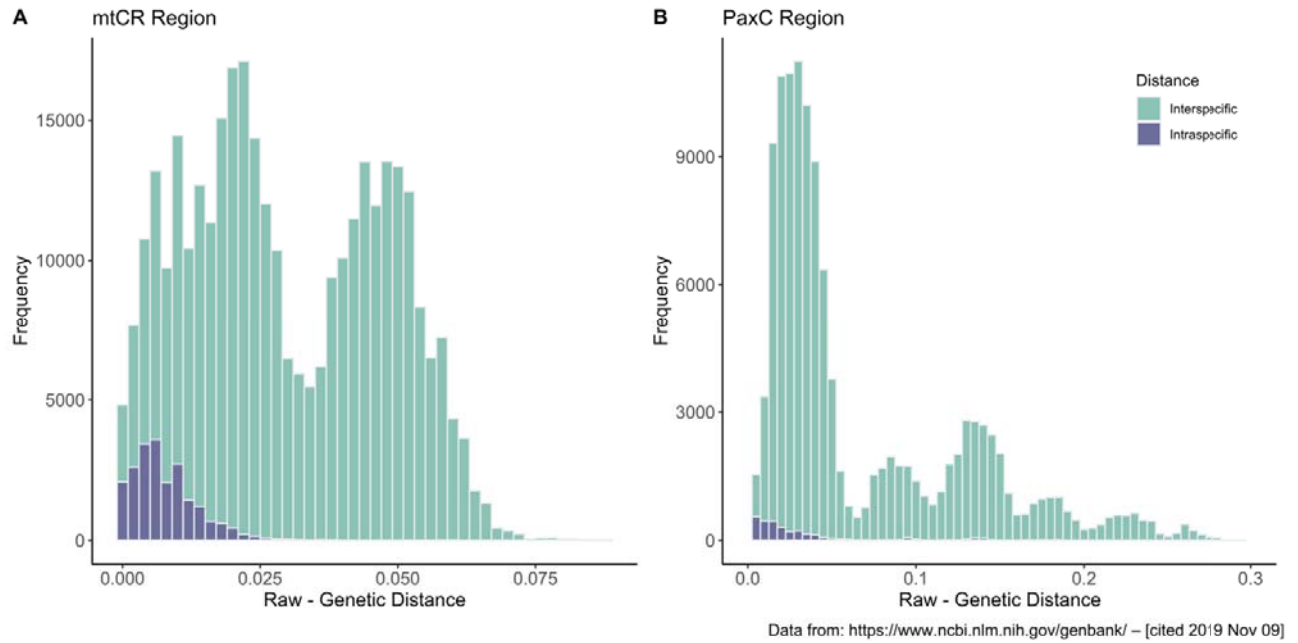

Figure 3: Barcoding gap (raw distance matrix frequency distribution). A) mtCR max distance = 0.0877 minimum distance = 0 (Bin size=0.002) B) PaxC max distance = 0.5895 minimum distance = 0 (Bin size =0.05)

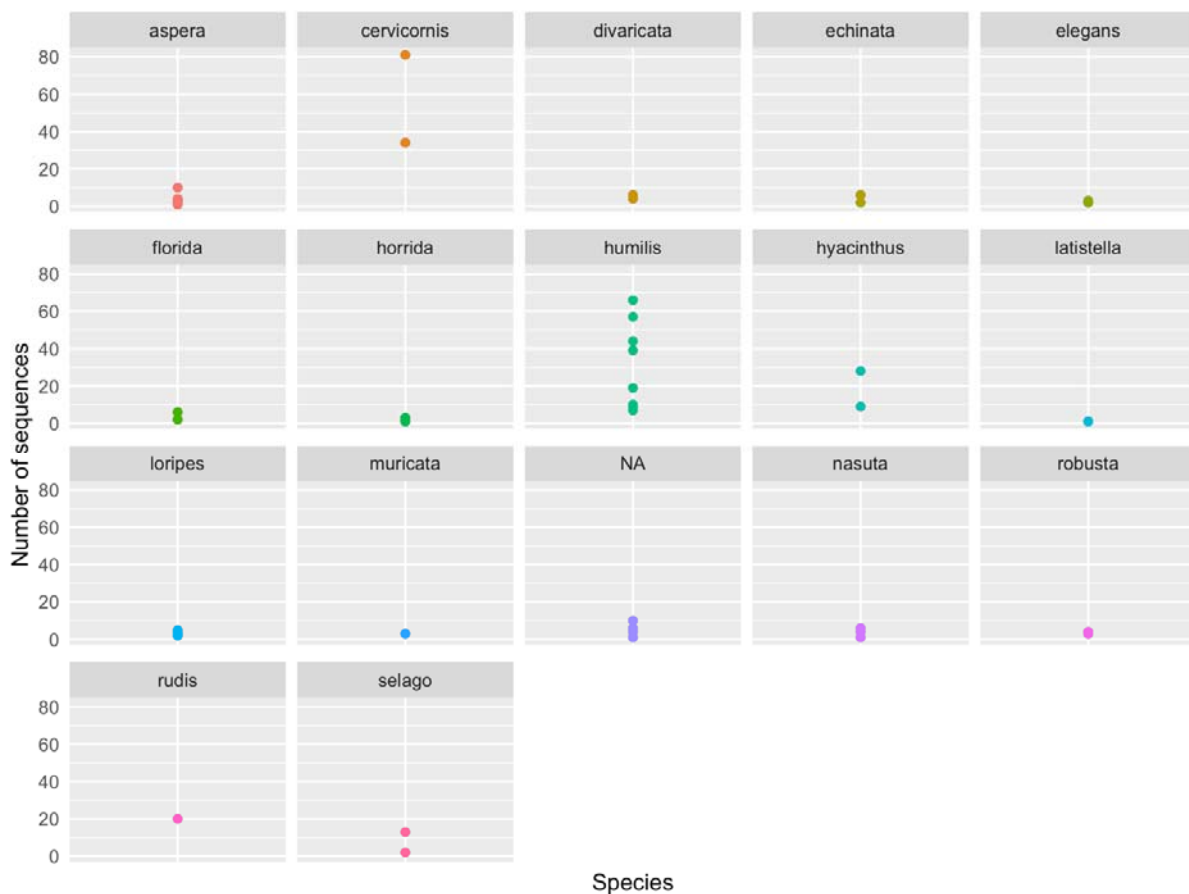

Figure 4: Number of mtCR references sequences with the same species name by species group

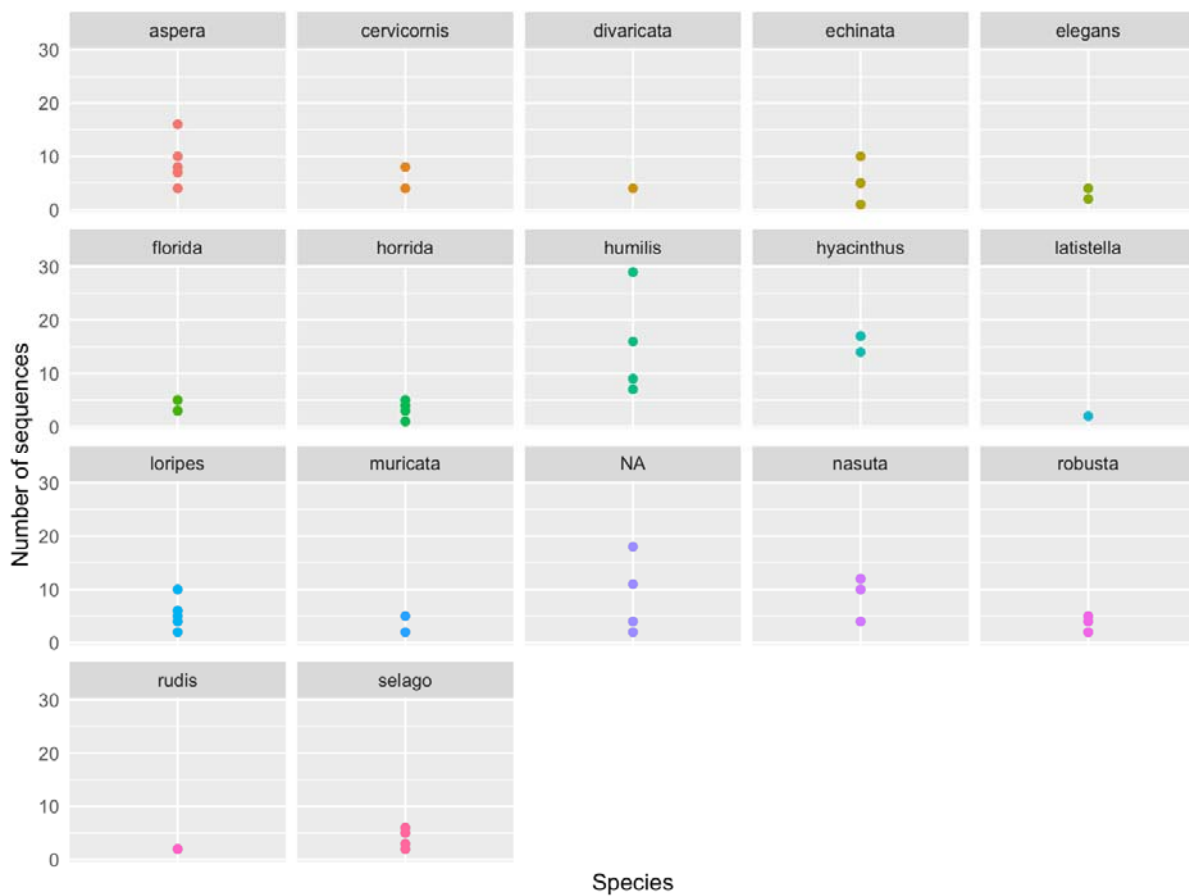

Figure 5: Number of PaxC references sequences with the same species name by species group



Table 1: Success rate across genes

| N samples | N samples overlapping | Gene        | N Sequences | Minimum sequence length | Maximum sequence length | Median sequence length |
|-----------|-----------------------|-------------|-------------|-------------------------|-------------------------|------------------------|
| 127       | 76                    | <i>mtCR</i> | 84          | 563                     | 904                     | 734                    |
|           |                       | <i>PaxC</i> | 90          | 429                     | 869                     | 649                    |

Table 2: Number of sample matching to a single or more (2+) species name on GenBank. Above the diagonal line match that agree between the two region. Below the diagonal line matches that disagree between the two region

|      |    | mtCR    |        |
|------|----|---------|--------|
|      |    | 1       | 2+     |
| PaxC | 1  | 23 / 13 | 20 / 6 |
|      | 2+ | 6 / 4   | 1 / 3  |

Table 3: Sources of *mtCR* references sequences by Paper title

| Journal                                                                         | Authors                                                                                        | Title                                                                                                                                                                                                       | N   | %    |
|---------------------------------------------------------------------------------|------------------------------------------------------------------------------------------------|-------------------------------------------------------------------------------------------------------------------------------------------------------------------------------------------------------------|-----|------|
| Doctoral Thesis (2003) James Cook University, Townsville, Queensland, Australia | Wolstenholme JK                                                                                | Species boundaries in scleractinia n corals: a case study of the <i>Acropora humilis</i> species group                                                                                                      | 242 | 41.8 |
| PLOS ONE 3 (9), E3240 (2008)                                                    | Z. T. Richards, M. J. H. van Oppen, C. C. Wallace, B. L. Willis, and D. J. Miller              | Some rare Indo-Pacific coral species are probable hybrids                                                                                                                                                   | 79  | 13.6 |
| Conserv. Genet. 18 (4) 825–835 (2017)                                           | M. D. Waterhouse, C. Blair, K. W. Larsen, and M. A. Russello                                   | Genetic Variation and Fine-Scale Population Structure in the Threatened <i>Acropora palmata</i> and <i>Acropora cervicornis</i> around Puerto Rico                                                          | 48  | 8.3  |
| Science 296 (5575), 2023-2025 (2002)                                            | S. V. Vollmer                                                                                  | Hybridization and the evolution of reef coral diversity                                                                                                                                                     | 42  | 7.3  |
| Mol. Biol. Evol. 18 (7), 1315-1329 (2001)                                       | M. J. H. van Oppen, B. J. McDonald, B. Willis, and D. J. Miller                                | The evolutionary history of the coral genus <i>Acropora</i> (Scleractinia, Cnidaria) based on a mitochondrial and a nuclear marker: reticulation, incomplete lineage sorting, or morphological convergence? | 41  | 7.1  |
| PLoS One 5 (1) e8652 (2010)                                                     | E. M. Hemond and S. V. Vollmer                                                                 | Genetic Diversity and Connectivity in the Threatened Staghorn Coral ( <i>Acropora cervicornis</i> ) in Florida                                                                                              | 32  | 5.5  |
| Mol. Ecol. 11 (8), 1339-1349 (2002)                                             | L. M. Márquez, M. J. H. Van Oppen, B. L. Willis, A. Reyes, and D. J. Miller                    | The highly cross-fertile coral species, <i>Acropora hyacinthus</i> and <i>Acropora cytherea</i> , constitute statistically distinguishable lineages                                                         | 21  | 3.6  |
| Zool. Sci. 29 (2), 134-140 (2012)                                               | G. Suzuki and H. Fukami                                                                        | Evidence of genetic and reproductive isolation between two morphs of subtropical-dominant coral <i>Acropora solitaria</i> ensis in the non-reef region of Japan                                             | 13  | 2.2  |
| Mol. Ecol. 24 (19), 5006-5019 (2015)                                            | N. L. Rosser                                                                                   | Asynchronous spawning in sympatric populations of a hard coral reveals cryptic species and an ancient genetic lineages                                                                                      | 8   | 1.4  |
| PeerJ 7, e6429 (2019)                                                           | H. Fukami, K. Iwao, N. H. Kumagai, M. Morita, and N. Isomura                                   | Maternal inheritance of F1 hybrid morphology and colony shape in the coral genus <i>Acropora</i>                                                                                                            | 6   | 1.0  |
| Syst. Biodivers. 8 (2), 281–288 (2010)                                          | Z. T. Richards, C. C. Wallace, and D. J. Miller                                                | Archetypal 'elkhorn' coral discovered in the Pacific Ocean                                                                                                                                                  | 6   | 1.0  |
| Mol. Phylogenet. Evol. 63 (2), 527-531 (2012)                                   | Y. Nakajima, A. Nishikawa, A. Iguchi, and K. Sakai                                             | The population genetic approach delineates the species boundary of reproductively isolated corymbose acroporid corals                                                                                       | 4   | 0.7  |
| Mar. Ecol. Prog. Ser. 355, 149–159 (2008)                                       | G. Suzuki, T. Hayashibara, Y. Shirayama, and H. Fukami                                         | Evidence of species-specific habitat selectivity of <i>Acropora</i> corals based on identification of new recruits by two molecular markers                                                                 | 3   | 0.5  |
| J. Mol. Evol. 55 (1), 1-13 (2002)                                               | M. J. H. Van Oppen, J. Catmull, B. J. McDonald, N. R. Hislop, P. J. Hagerman, and D. J. Miller | The mitochondrial genome of <i>Acropora tenuis</i> (Cnidaria; Scleractinia) contains a large group I intron and a candidate control region                                                                  | 1   | 0.2  |
| Mitochondrial DNA, 1-2 (2015) In press                                          | Y. Zhang, X. Yu, Z. Zhou, and B. Huang                                                         | The complete mitochondrial genome of <i>Acropora aculeus</i> (Cnidaria, Scleractinia, Acroporidae)                                                                                                          | 1   | 0.2  |
| Proc. R. Soc. Lond., B, Biol. Sci. 266 (1415), 179-183 (1999)                   | M. J. H. Van Oppen, B. L. Willis, and D. J. Miller                                             | Atypically low rate of cytochrome b evolution in the scleractinian coral genus <i>Acropora</i>                                                                                                              | 1   | 0.2  |
| Unpublished                                                                     | Santacruz-Castro, A. and Dai, C.F.                                                             | Latitudinal cline in the reproductive traits and local adaptation of the <i>Acropora hyacinthus</i> species complex                                                                                         | 20  | 3.5  |
| Unpublished                                                                     | Chan, C.L. and Chen, C.A.                                                                      | Multiplex next generation sequencing of scleractinian mitochondrial genomes                                                                                                                                 | 11  | 1.9  |

Table 4: Sources of PaxC references sequences by Paper title

| Journal                                        | Authors                                                                           | Title                                                                                                                                                                                                       | N   | %    |
|------------------------------------------------|-----------------------------------------------------------------------------------|-------------------------------------------------------------------------------------------------------------------------------------------------------------------------------------------------------------|-----|------|
| PLoS ONE 3 (9), E3240 (2008)                   | Z. T. Richards, M. J. H. van Oppen, C. C. Wallace, B. L. Willis, and D. J. Miller | Some rare Indo-Pacific coral species are probable hybrids                                                                                                                                                   | 138 | 39.2 |
| Mol. Biol. Evol. 18 (7), 1315-1329 (2001)      | M. J. H. van Oppen, B. J. McDonald, B. Willis, and D. J. Miller                   | The evolutionary history of the coral genus <i>Acropora</i> (Scleractinia, Cnidaria) based on a mitochondrial and a nuclear marker: reticulation, incomplete lineage sorting, or morphological convergence? | 87  | 24.7 |
| Mol. Ecol. 11 (8), 1339-1349 (2002)            | L. M. Márquez, M. J. H. Van Oppen, B. L. Willis, A. Reyes, and D. J. Miller       | The highly cross-fertile coral species, <i>Acropora hyacinthus</i> and <i>Acropora cytherea</i> , constitute statistically distinguishable lineages                                                         | 34  | 9.7  |
| Mol. Ecol. 24 (19), 5006-5019 (2015)           | N. L. Røsser                                                                      | Asynchronous spawning in sympatric populations of a hard coral reveals cryptic species and ancient genetic lineages                                                                                         | 16  | 4.5  |
| Syst. Biodivers. 8 (2), 281-288 (2010)         | Z. T. Richards, C. C. Wallace, and D. J. Miller                                   | Archetypal 'elkhorn' coral discovered in the Pacific Ocean                                                                                                                                                  | 10  | 2.8  |
| Evol. Ecol. (2011) In press                    | S. R. Palumbi, S. Vollmer, S. Romano, T. Oliver, and J. Ladner                    | The role of genes in understanding the evolutionary ecology of reef building corals                                                                                                                         | 3   | 0.9  |
| Galaxea, J. Coral Reef Stud. 10 (2), 91 (2008) | M. Hatta and K. Matsushima                                                        | Presumed natural hybrids between <i>Acropora donei</i> and <i>Acropora tenuis</i>                                                                                                                           | 3   | 0.9  |
| Mol. Ecol. 9 (9), 1363-1373 (2000)             | M. J. H. Van Oppen, B. L. Willis, H. W. J. A. Van Vugt, and D. J. Miller          | Examination of species boundaries in the <i>Acropora cervicornis</i> group (Scleractinia, cnidaria) using nuclear DNA sequence analyses                                                                     | 3   | 0.9  |
| Unpublished                                    | Wei, N.V., Tang, P.-C. and Chen, A.C.                                             | Hybridization does not occur among common <i>Acropora</i> species in a marginal coral assemblage                                                                                                            | 29  | 8.2  |
| Unpublished                                    | Ohki, S., Kowalski, R.K., Kitanobou, S. and Morita, M.                            | Different timing of the spawning is related to reproductive isolation and gamete species recognition in the broadcast spawning coral <i>Acropora</i>                                                        | 27  | 7.7  |
| Unpublished                                    | van Oppen, M.J.H. and Miller, D.J.                                                | A new single-locus nuclear DNA marker for evolutionary studies in the scleractinian coral genus <i>Acropora</i>                                                                                             | 2   | 0.6  |
